# Supplementary material for: Persistence of SARS CoV-2 S1 Protein in CD16+ Monocytes in Post-Acute Sequelae of COVID-19 (PASC) up to 15 Months Post-Infection
Source: PubMed Central journal article supplement (PMC8784688; doi:10.3389/fimmu.2021.746021), 2022-01-10
Supplement: DataSheet_1.pdf [file DataSheet_1.pdf]

| No. | Position | Sequences                   |
|-----|----------|-----------------------------|
| 1   | 27-37    | VFRSSVLHSTQ                 |
| 2   | 32-37    | VLHSTQ                      |
| 3   | 65-72    | DNPVLPFN                    |
| 4   | 63-82    | RFDNPVLPFNDGVYFASTEK        |
| 5   | 70-82    | PFNDGVYFASTEK               |
| 6   | 73-82    | DGVYFASTEK                  |
| 7   | 96-98    | DSK                         |
| 8   | 163-167  | DLEGK                       |
| 9   | 168-172  | QGNFK                       |
| 10  | 173-180  | NLREFVFK                    |
| 11  | 174-180  | LREFVFK                     |
| 12  | 181-182  | NI                          |
| 13  | 183-187  | DGYFK                       |
| 14  | 192-199  | HTPINLVR                    |
| 15  | 213-237  | DLPIGINITRFQTLALHRS YLTPG   |
| 16  | 272-274  | DAV                         |
| 17  | 275-278  | DCAL                        |
| 18  | 272-285  | DAVDCALDCALDPLSETK          |
| 19  | 281-289  | LSETKCTLK                   |
| 20  | 290-295  | SFTVEK                      |
| 21  | 342-348  | RISNCVA                     |
| 22  | 364-371  | CYGVSPK                     |
| 23  | 374-386  | DLCFTNVYADSFV               |
| 24  | 372-388  | LNDLCFTNVYADSFVIRGDEVRQIAPG |
| 25  | 383-389  | DSFVIRG                     |
| 26  | 403-404  | IA                          |
| 27  | 405-409  | DYNYK                       |
| 28  | 403-409  | IADYNYK                     |
| 29  | 405-411  | DYNYKLP                     |
| 30  | 413-426  | DFTGCVIAWNSNNL              |
| 31  | 427-429  | DSK                         |
| 32  | 430-439  | VGGNYNYLYR                  |
| 33  | 448-451  | PFER                        |
| 34  | 514-520  | KSTNLVK                     |
| 35  | 515-520  | STNLVK                      |
| 36  | 523-542  | CVNFNFNGLTGTGVLTESNK        |
| 37  | 523-543  | CVNFNFNGLTGTGVLTESNKK       |
| 38  | 544-552  | FLPFQQFGR                   |
| 39  | 544-555  | FLPFQQFGRDIA                |
| 40  | 546-552  | PFQQFGR                     |
| 41  | 546-555  | PFQQFGRDIA                  |
| 42  | 559-562  | DAVR                        |
| 43  | 563-570  | DPQLEIL                     |
| 44  | 612-619  | DQLTPTWR                    |

45 612-657 DQLTPTWRVYSTGSNVFQTR AGCLIGAEHVNNSYECDIPIGAGICA  
46 648-657 DIPIGAGICA

| Detected from the purified protein |                    |                | Detected from Patient |        | Peak Intensity |
|------------------------------------|--------------------|----------------|-----------------------|--------|----------------|
| Mass                               | [M+H] <sup>+</sup> | Retention Time | [M/z+H] <sup>+</sup>  | Charge | Sample 1       |
| 1259.6695                          | 1260.677           | 11.46          | 630.8222              | 2+     | 1.808E+05      |
| 683.3595                           | 684.3673           | 6.15           | 342.6699              | 2+     | 1.745E+04      |
| 914.457                            | 915.4648           | 18.47          | 458.2172              | 2+     | 1.278E+04      |
| 2315.1237                          | 2316.132           | 23.97          | 772.7145              | 3+     | x              |
| 1473.6768                          | 1474.685           | 17.38          | 737.8457              | 2+     | x              |
| 1115.5207                          | 1116.529           | 12.35          | 558.7509              | 2+     | x              |
| 348.1718                           | 349.1796           | 11.48          | 175.0872              | 2+     | 5.290E+04      |
| 560.2878                           | 561.2956           | 5.5            | 561.2878              | 1+     | 1.997E+04      |
| 592.3042                           | 593.312            | 7.88           | 297.1422              | 2+     | 3.058E+04      |
| 1051.5887                          | 1052.597           | 8.96           | 526.7962              | 2+     | 5.717E+04      |
| 937.54                             | 938.5478           | 22.23          | 469.7794              | 2+     | 2.649E+04      |
| 245.1448                           | 246.1526           | 1.14           | 246.145               | 1+     | 2.526E+04      |
| 628.2929                           | 629.3007           | 19.17          | 315.1534              | 2+     | 9.022E+03      |
| 948.5577                           | 949.5655           | 14.8           | 475.2864              | 2+     | 1.656E+04      |
| 2808.5722                          | 2809.58            | 24.13          | 937.1902              | 3+     | x              |
| 303.1503                           | 304.1581           | 4.98           | 304.1509              | 1+     | 1.537E+06      |
| 477.1966                           | 478.2044           | 12.35          | 478.1886              | 1+     | x              |
| 1532.7036                          | 1533.711           | 16.33          | 767.3572              | 2+     | x              |
| 1021.53                            | 1022.538           | 11.48          | 511.7731              | 2+     | 1.901E+07      |
| 709.3719                           | 710.3797           | 9.5            | 710.364               | 1+     | 2.695E+03      |
| 818.4141                           | 819.4219           | 12.39          | 410.2057              | 2+     | 5.351E+04      |
| 910.4291                           | 911.4369           | 9.69           | 456.2201              | 2+     | 1.222E+06      |
| 1492.6672                          | 1493.675           | 13.03          | 747.3352              | 2+     | 1.523E+03      |
| 2045.987                           | 2046.995           | 31.26          | 1023.9987             | 2+     | 4.717E+03      |
| 792.4202                           | 793.428            | 11.18          | 397.2144              | 2+     | 1.015E+05      |
| 202.139                            | 203.1468           | 4.7            | 203.1408              | 1+     | 1.598E+04      |
| 701.3093                           | 702.3171           | 9.31           | 351.6528              | 2+     | 8.901E+04      |
| 885.424                            | 886.4318           | 11.04          | 443.7209              | 2+     | 1.626E+04      |
| 911.436                            | 912.4438           | 14.92          | 456.7217              | 2+     | 6.918E+04      |
| 1609.7267                          | 1610.735           | 25.38          | 805.877               | 2+     | 1.002E+04      |
| 348.1718                           | 349.1796           | 11.44          | 349.1841              | 1+     | 6.750E+06      |
| 1217.5792                          | 1218.587           | 12.84          | 609.7855              | 2+     | 7.934E+03      |
| 547.2827                           | 548.2905           | 7.28           | 548.274               | 1+     | 5.134E+03      |
| 788.474                            | 789.4818           | 10.5           | 395.2259              | 2+     | 4.663E+03      |
| 660.3879                           | 661.3957           | 4.93           | 331.1923              | 2+     | 6.319E+04      |
| 2171.039                           | 2172.047           | 17.93          | 724.6711              | 3+     | 3.216E+04      |
| 2299.1267                          | 2300.135           | 24.6           | 767.3803              | 3+     | x              |
| 1138.5996                          | 1139.607           | 14.72          | 570.2873              | 2+     | 3.151E+04      |
| 1437.7435                          | 1438.751           | 16.52          | 719.8711              | 2+     | 9.352E+03      |
| 878.4396                           | 879.4474           | 18.5           | 440.2128              | 2+     | 1.575E+04      |
| 1177.5887                          | 1178.597           | 22.71          | 589.7847              | 2+     | 6.565E+03      |
| 459.2514                           | 460.2592           | 5.8            | 460.2429              | 1+     | 2.088E+05      |
| 927.4986                           | 928.5064           | 21.42          | 928.498               | 1+     | 3.482E+03      |
| 1015.5088                          | 1016.517           | 15.3           | 508.7594              | 2+     | 1.107E+04      |

|           |          |       |           |    |           |
|-----------|----------|-------|-----------|----|-----------|
| 4926.2802 | 4927.288 | 22.02 | 1232.5713 | 4+ | 9.719E+03 |
| 985.483   | 986.4908 | 21.22 | 493.7432  | 2+ | 1.982E+04 |

| Sample 2  | Sample 3  | Sample 4  | Sample 5  | Sample 6  |
|-----------|-----------|-----------|-----------|-----------|
| 1.769E+05 | 2.203E+05 | 1.656E+05 | 4.874E+04 | 2.169E+05 |
| 1.589E+04 | 1.350E+04 | 1.784E+04 | 2.152E+04 | 1.889E+04 |
| 2.158E+04 | 3.455E+04 | 2.094E+04 | 2.738E+04 | 2.220E+04 |
| 4.101E+03 | 1.217E+04 | 8.495E+03 | 9.346E+03 | x         |
| x         | 1.617E+04 | 4.575E+03 | 1.183E+04 | x         |
| 4.067E+03 | 5.732E+03 | 2.266E+04 | 1.409E+04 | 6.881E+03 |
| 6.324E+04 | 7.220E+04 | 5.870E+04 | 1.639E+05 | 8.167E+04 |
| 2.197E+04 | 2.551E+04 | 1.332E+05 | 1.084E+05 | 1.631E+04 |
| 1.723E+04 | 3.286E+04 | 3.380E+04 | 1.705E+04 | 3.796E+04 |
| 8.879E+04 | 1.554E+05 | 2.275E+05 | 8.242E+04 | 1.476E+05 |
| 2.985E+04 | 3.496E+04 | 6.535E+04 | 5.821E+04 | 4.626E+04 |
| 6.399E+03 | 1.988E+04 | 9.223E+03 | 4.179E+04 | 2.286E+04 |
| 1.040E+04 | 1.347E+04 | 1.329E+04 | 2.176E+04 | 1.139E+04 |
| 1.721E+04 | 1.008E+04 | 2.537E+04 | 2.122E+04 | 2.065E+04 |
| x         | 5.500E+03 | 8.609E+03 | 1.423E+04 | 4.446E+03 |
| 1.407E+06 | 1.464E+06 | 1.418E+06 | 1.295E+06 | 4.981E+05 |
| x         | 4.533E+04 | 1.090E+04 | 6.507E+03 | x         |
| x         | 6.123E+03 | 7.722E+03 | 1.660E+04 | x         |
| 1.672E+07 | 1.987E+07 | 1.573E+07 | 6.078E+06 | 1.817E+07 |
| 2.467E+03 | 2.373E+03 | 1.731E+03 | x         | 1.978E+03 |
| 4.052E+04 | 8.367E+05 | 1.616E+05 | 1.818E+05 | 2.209E+04 |
| 1.304E+06 | 1.252E+06 | 1.248E+06 | 1.406E+06 | 1.225E+06 |
| 4.927E+03 | 2.662E+03 | 4.103E+03 | 5.292E+03 | 4.571E+03 |
| 1.011E+04 | 5.340E+04 | 2.073E+04 | 2.083E+04 | 2.559E+03 |
| 1.018E+05 | 1.276E+05 | 5.225E+05 | 3.503E+05 | 7.019E+04 |
| 1.930E+04 | 2.912E+04 | 2.263E+04 | 2.229E+04 | 1.991E+04 |
| 9.015E+04 | 8.309E+04 | 8.734E+04 | 9.850E+04 | 7.720E+04 |
| 3.843E+04 | 2.013E+04 | 4.090E+04 | 3.193E+04 | 3.519E+04 |
| 4.840E+04 | 5.857E+05 | 2.030E+05 | 2.381E+05 | 3.273E+04 |
| 1.103E+04 | 1.482E+04 | 2.652E+04 | 4.200E+04 | 1.453E+04 |
| 7.032E+06 | 8.125E+06 | 8.544E+06 | 8.371E+06 | 7.452E+06 |
| 6.525E+03 | 6.022E+03 | 1.922E+04 | 9.391E+03 | 7.370E+03 |
| 3.548E+03 | 7.167E+04 | 2.117E+04 | 1.858E+03 | 2.796E+03 |
| 9.453E+03 | 7.707E+03 | 2.175E+04 | 4.092E+04 | 9.452E+03 |
| 5.495E+04 | 4.786E+04 | 6.364E+04 | 3.018E+04 | 6.595E+04 |
| 2.198E+04 | 3.136E+04 | 4.001E+04 | 2.229E+04 | 5.302E+04 |
| x         | x         | 4.706E+03 | 1.051E+04 | x         |
| 2.070E+04 | 1.490E+05 | 1.148E+05 | 4.230E+04 | 1.843E+04 |
| 5.572E+03 | 4.280E+04 | 2.321E+04 | 1.096E+05 | 4.708E+03 |
| 4.693E+03 | 9.308E+03 | 5.106E+03 | 1.582E+04 | 1.322E+04 |
| 1.047E+04 | 5.887E+04 | 2.925E+04 | 1.749E+04 | 3.925E+03 |
| 1.946E+05 | 1.439E+06 | 4.090E+05 | 2.855E+05 | 1.502E+05 |
| x         | 5.044E+03 | 2.176E+03 | x         | 3.033E+03 |
| x         | 1.842E+04 | 7.772E+03 | 5.101E+03 | 1.234E+04 |

|           |           |           |           |           |
|-----------|-----------|-----------|-----------|-----------|
| 9.259E+03 | 1.295E+04 | 1.161E+04 | 6.864E+03 | 1.030E+04 |
| 3.112E+03 | 6.618E+03 | 3.550E+03 | 1.112E+04 | 6.703E+03 |
